# Supplementary material for: Spectroscopic Evidence of the Improvement of Reactive Iron Mineral Content in Red Soil by Long-Term Application of Swine Manure
Source: PubMed Central journal article supplement (PMC4713869; doi:10.1371/journal.pone.0146364), 2016-01-11
Supplement: pone.0146364.s001.pdf [file pone.0146364.s001.pdf]

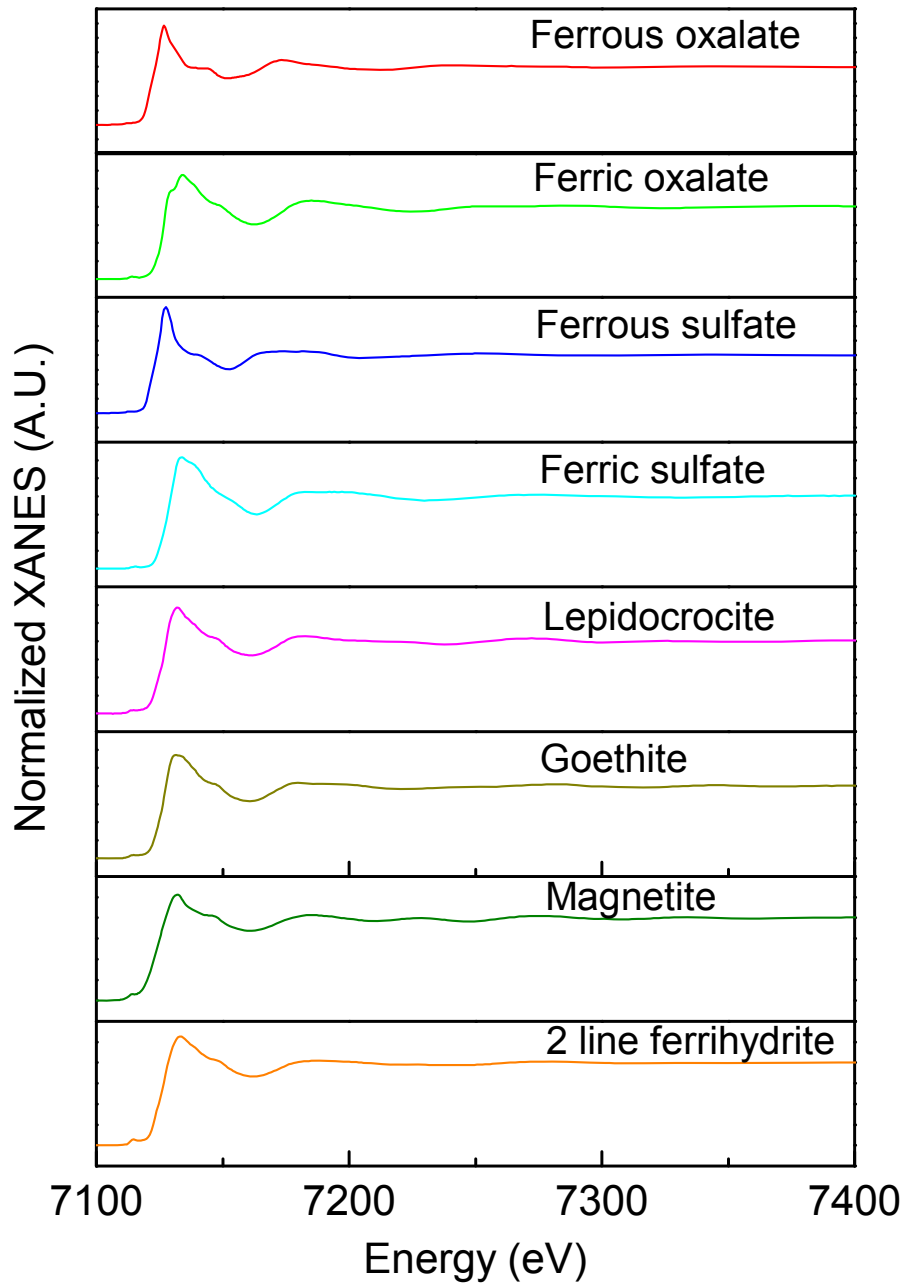

18

19 **S2 Fig.** Fe K-edge XANES spectra of reference materials.
