# Supplementary material for: Spectroscopic Evidence of the Improvement of Reactive Iron Mineral Content in Red Soil by Long-Term Application of Swine Manure
Source: PubMed Central journal article supplement (PMC4713869; doi:10.1371/journal.pone.0146364), 2016-01-11
Supplement: pone.0146364.s002.pdf [file pone.0146364.s002.pdf]

1 **Table S1** Peak assignment for C forms obtained from C 1s NEXAFS and corresponding FTIR spectroscopy <sup>a</sup>

| Deconvolution curve | Carbon forms                                | Energy level (eV) | Fit position | Functional group                             | FTIR Spectroscopy ( cm <sup>-1</sup> ) |
|---------------------|---------------------------------------------|-------------------|--------------|----------------------------------------------|----------------------------------------|
| G1                  | Aromatic C, Quinone-C: C=O                  | 283.0-284.5       | 284.5        |                                              |                                        |
| G2                  | Carbonyl-substituted Aromatic<br>C: C=C     | 284.9-285.5       | 285.4        | Aromatic type C                              | 1600-1650                              |
| G3                  | Unsaturated C: C=O                          | 285.8-286.2       | 286.1        |                                              |                                        |
| G4                  | Phenol-C, ketone: C=O;<br>R-(C=O)R'; C=C-OH | 286.0-287.4       | 286.7        | Aromatic C with<br>side chain<br>substituent | 1513-1515                              |
| G5                  | Alkyl C: C-H                                | 287.0-287.6       | 287.6        | Alkyl C                                      | 1030-1080                              |
| G6                  | Aliphatic-C, aromatic carbonyl              | 288.0-288.7       | 288.5        | Carboxylic C                                 | 1720                                   |
| G7                  | Carbonyl-C, alcohol O-alkyl C:<br>C-OH      | 289.2-289.5       | 289.2        | O-alkyl C                                    | 2850-2920                              |
| G8                  | O-alkyl C/carbonyl                          | 289.5-290.2       | 289.9        |                                              |                                        |

2 <sup>a</sup> The deconvolution parameters were referred from Heymann et al. (2011)[17] and Schumacher et al. (2005)[12]; the FTIR parameters were

3 referred from Hodgkins et al. (2014)[40].
